# Supplementary material for: Electronic modulation of heterostructured MoOx supported Ru as robust bifunctional catalyst for overall water splitting
Source: Royal Society of Chemistry journal article supplement (doi:10.1039/d3ce00612c), 2023-01-01
Supplement: d3ce00612c1.pdf [file d3ce00612c1.pdf]

Supporting Information for

# Heterostructured $\text{MoO}_x$ supported Ru as robust bifunctional catalyst for overall water splitting

Yangyang Wang,<sup>a</sup> Xin Wen,<sup>a</sup> Xiaojing Dong,<sup>a</sup> Chen Xu,<sup>a</sup> Wenguang Ma,<sup>a</sup>

Yiqiang Sun,<sup>a</sup> Bo Xu<sup>\*a,b</sup> and Cuncheng Li<sup>\*a</sup>

<sup>a</sup> School of Chemistry and Chemical Engineering, University of Jinan, Shandong,  
Jinan 250022, P. R. China.

<sup>b</sup> State Key Laboratory of Structural Chemistry, Fujian Institute of Research on the  
Structure of Matter, Chinese Academy of Sciences, Fujian, Fuzhou, 350002, P. R.  
China.

---

\*Corresponding author.

E-mail address: chm\_xub@ujn.edu.cn (B. Xu), chm\_licc@ujn.edu.cn

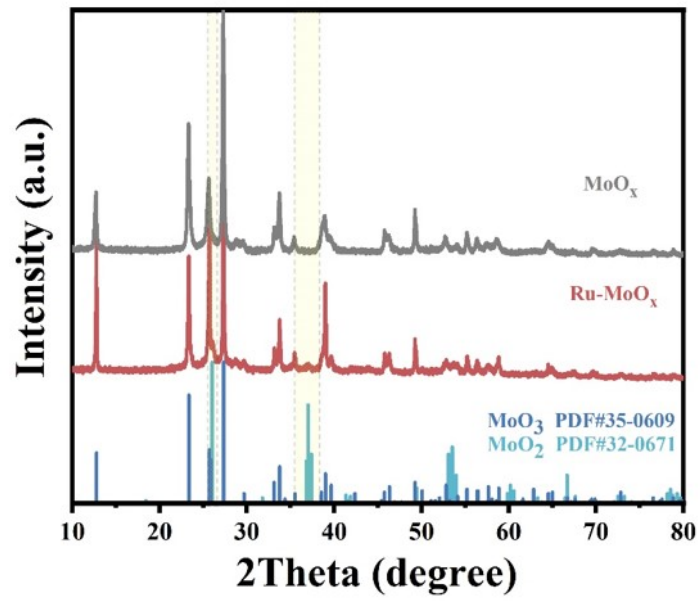

Figure S1 XRD patterns of MoO<sub>x</sub>.

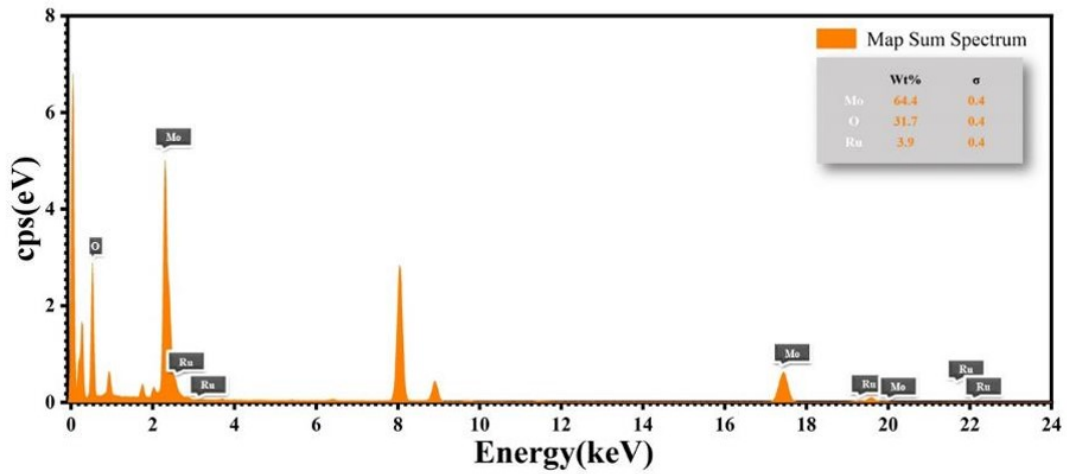

Figure S2 EDX patterns of the Ru-MoO<sub>x</sub>.

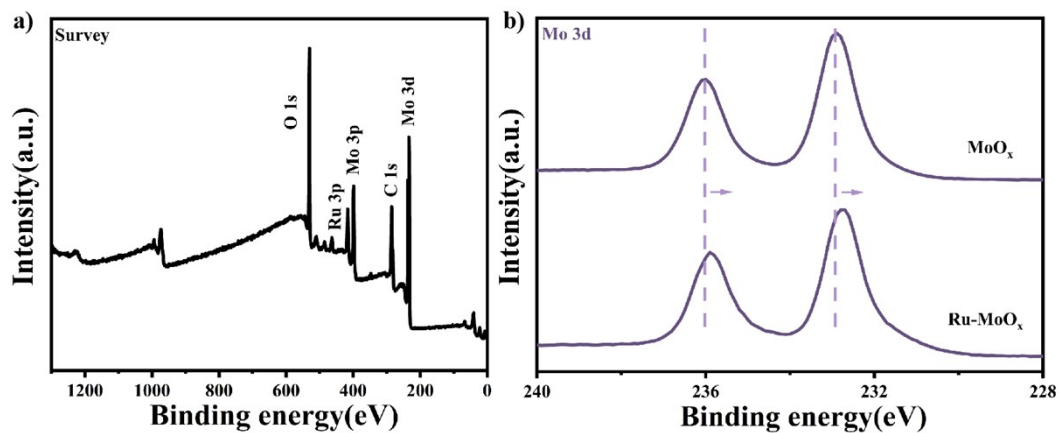

Figure S3 a) XPS survey for Ru-MoO<sub>x</sub>; b) Mo 3d of MoO<sub>x</sub> and Ru-MoO<sub>x</sub>.

Table S1 : The distribution of the oxidation state of Mo atoms on the surface of the catalysts obtained at different temperatures based on XPS analysis.

| Catalyst                | Mo <sup>4+</sup> (at%) | Mo <sup>5+</sup> (at%) | Mo <sup>6+</sup> (at%) |
|-------------------------|------------------------|------------------------|------------------------|
| RuMoO <sub>x</sub> -350 | 49.17                  | -----                  | 50.83                  |
| RuMoO <sub>x</sub> -400 | -----                  | 26.76                  | 73.24                  |
| Ru-MoO <sub>x</sub>     | -----                  | 28.36                  | 71.64                  |
| RuMoO <sub>x</sub> -500 | -----                  | 25.46                  | 74.54                  |

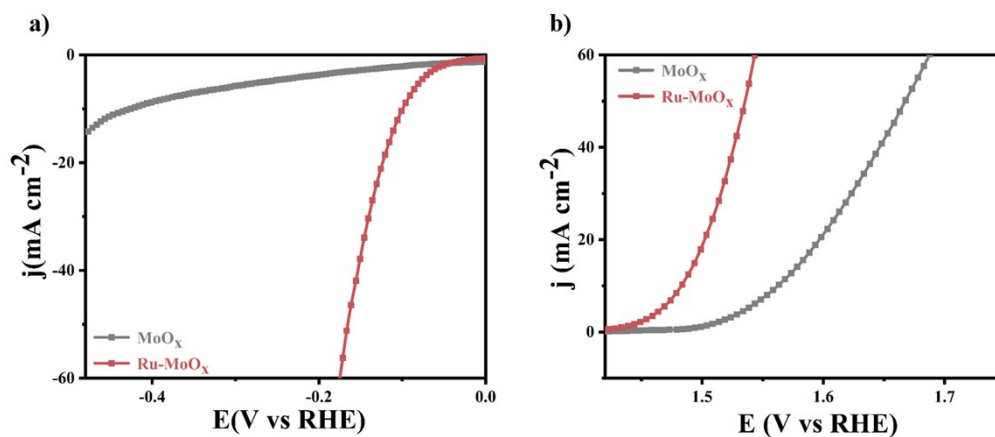

Figure S4 a) The HER polarization curves and b) The OER polarization curves of MoO<sub>x</sub> and Ru-MoO<sub>x</sub>.

Table S2 : Comparison of some recently reported representative electrocatalysts for HER.

| Catalysts                                        | Electrolytes | $\eta$ @ (10 mA cm <sup>-2</sup> ) | Ref.             |
|--------------------------------------------------|--------------|------------------------------------|------------------|
| Ru-MoO <sub>x</sub>                              | 1.0 M KOH    | 85 mV                              | This work        |
| Ru-VN                                            | 1.0 M KOH    | 144 mV                             | Ref <sup>1</sup> |
| RuO <sub>2</sub> -Fe <sub>2</sub> O <sub>3</sub> | 1.0 M KOH    | 148 mV                             | Ref <sup>2</sup> |
| Ru-CoNi@NC-2                                     | 1.0 M KOH    | 268 mV                             | Ref <sup>3</sup> |
| Ru-WSe <sub>2</sub>                              | 1.0 M KOH    | 87 mV                              | Ref <sup>4</sup> |
| S-RuP@NPSC-900                                   | 1.0 M KOH    | 92 mV                              | Ref <sup>5</sup> |
| Ru <sub>1</sub> +NPs/N-C                         | 1.0 M KOH    | 39 mV                              | Ref <sup>6</sup> |
| Ru/Co <sub>4</sub> N-CoF <sub>2</sub>            | 1.0 M KOH    | 53 mV                              | Ref <sup>7</sup> |
| CoRu-O/A@HNC-2                                   | 1.0 M KOH    | 85 mV                              | Ref <sup>8</sup> |

Table S3 : Comparison of some recently reported representative electrocatalysts for OER.

| Catalysts                           | Electrolytes | $\eta$ @ (10 mA cm <sup>-2</sup> ) | Ref.              |
|-------------------------------------|--------------|------------------------------------|-------------------|
| Ru-MoO <sub>x</sub>                 | 1.0 M KOH    | 235 mV                             | This work         |
| RuCo@NC                             | 1.0 M KOH    | 280 mV                             | Ref <sup>9</sup>  |
| Ru-Ni(OH) <sub>2</sub>              | 1.0 M KOH    | 295 mV                             | Ref <sup>10</sup> |
| Ru-FeRu@C/NC                        | 1.0 M KOH    | 345 mV                             | Ref <sup>11</sup> |
| Ru/N-BP2000                         | 1.0 M KOH    | 285 mV                             | Ref <sup>12</sup> |
| Ru-CoNi@NC-2                        | 1.0 M KOH    | 240 mV                             | Ref <sup>3</sup>  |
| Ru/Co <sub>3</sub> O <sub>4-x</sub> | 1.0 M KOH    | 280 mV                             | Ref <sup>13</sup> |
| Ru/Co-N-C                           | 1.0 M KOH    | 247 mV                             | Ref <sup>14</sup> |
| RuO <sub>x</sub> NCs                | 1.0 M KOH    | 266 mV                             | Ref <sup>15</sup> |

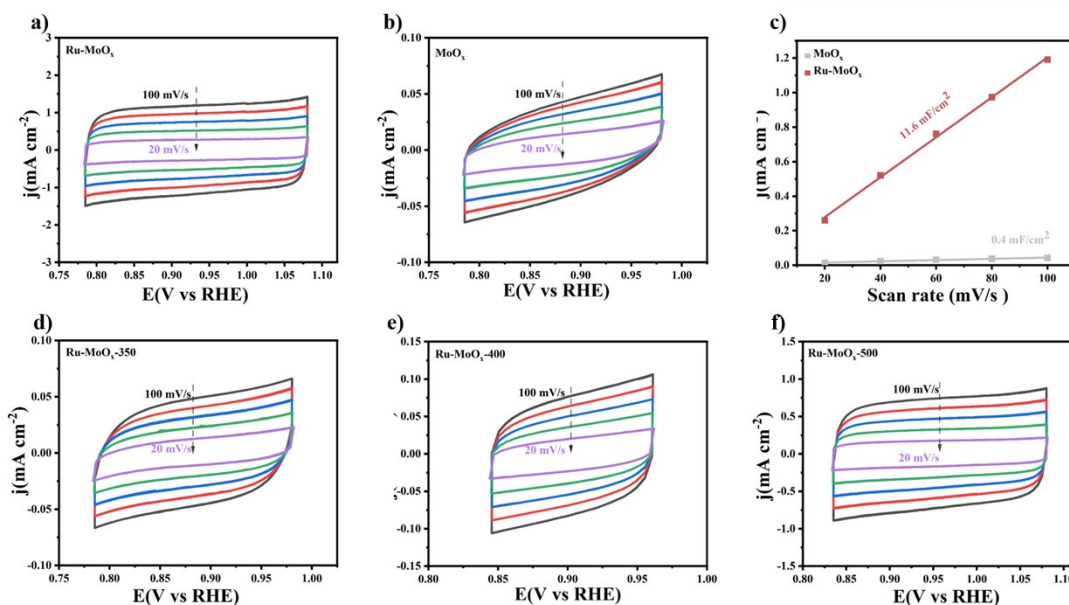

Figure S5 a, b and d-f) CVs measured for Ru-MoO<sub>x</sub>, MoO<sub>x</sub>, Ru-MoO<sub>x</sub>-350, Ru-MoO<sub>x</sub>-400 and Ru-MoO<sub>x</sub>-500 in 1.0 M KOH at different scan rates of 20, 40, 60, 80 and 100 mV s<sup>-1</sup>; c)  $C_{dl}$  for Ru-MoO<sub>x</sub> and MoO<sub>x</sub>.

Table S4 : Comparison of some recently reported representative bifunctional electrocatalysts for overall water splitting.

| Catalysts                                                   | Electrolytes | $\eta$ @ (10 mA cm <sup>-2</sup> ) | Ref.              |
|-------------------------------------------------------------|--------------|------------------------------------|-------------------|
| Ru-MoO <sub>x</sub> (+,-)                                   | 1.0 M KOH    | 1.54 V                             | This work         |
| Ru-HPC    P-RuO <sub>2</sub>                                | 1.0 M KOH    | 1.53 V                             | Ref <sup>16</sup> |
| CoRu-O/A@HNC-2(+,-)                                         | 1.0 M KOH    | 1.558 V                            | Ref <sup>8</sup>  |
| Ru/c-Ti <sub>3</sub> C <sub>2</sub> T <sub>x</sub> /NF(+,-) | 1.0 M KOH    | 1.53 V                             | Ref <sup>17</sup> |
| Ru/Co(OH)F  Ru/Co <sub>4</sub> N-CoF <sub>2</sub>           | 1.0 M KOH    | 1.55 V                             | Ref <sup>7</sup>  |
| Ru/NF-2(+,-)                                                | 1.0 M KOH    | 1.56 V                             | Ref <sup>18</sup> |
| NF@NiO@Ru(+,-)                                              | 1.0 M KOH    | 1.55 V                             | Ref <sup>19</sup> |
| Ru@MoO(S) <sub>3</sub> (+,-)                                | 1.0 M KOH    | 1.526 V                            | Ref <sup>20</sup> |
| RuNi <sub>1</sub> Co <sub>1</sub> @CMT(+,-)                 | 1.0 M KOH    | 1.58 V                             | Ref <sup>21</sup> |

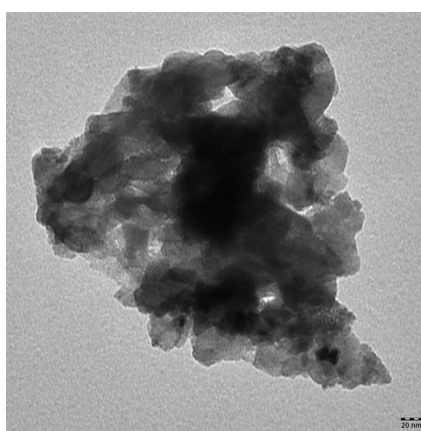

Figure S6 TEM of Ru-MoO<sub>x</sub> after the durability test.

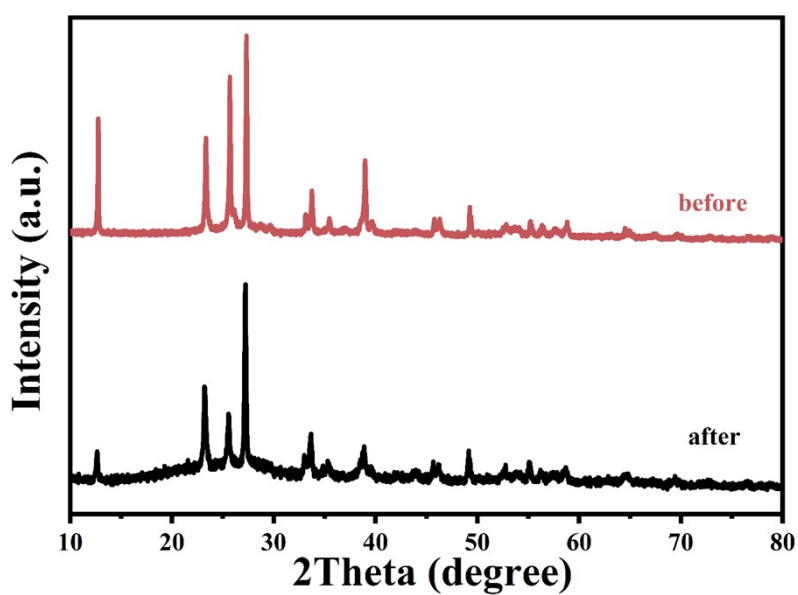

Figure S7 XRD of Ru-MoO<sub>x</sub> before and after the durability test.

## References

1. W. Wang, Y. Shao, Z. Wang, Z. Yang, Z. Zhen, Z. Zhang, C. Mao, X. Guo and G. Li, *ChemElectroChem*, 2020, **7**, 1201-1206.
2. H. Mosallaei, H. Hadadzadeh, A. Foelske, M. Sauer, H. Amiri Rudbari and O. Blacque, *Dalton Transactions*, 2022, **51**, 6314-6331.
3. W. Wang, S. Xi, Y. Shao, W. Sun, S. Wang, J. Gao, C. Mao, X. Guo and G. Li, *ACS Sustainable Chemistry & Engineering*, 2019, **7**, 17227-17236.
4. Y. Zhao, G. Mao, C. Huang, P. Cai, G. Cheng and W. Luo, *Inorganic Chemistry Frontiers*, 2019, **6**, 1382-1387.
5. X. Liu, F. Liu, J. Yu, G. Xiong, L. Zhao, Y. Sang, S. Zuo, J. Zhang, H. Liu and W. Zhou, *Advanced Science*, 2020, **7**, 2001526.
6. S. Wang, M. Wang, Z. Liu, S. Liu, Y. Chen, M. Li, H. Zhang, Q. Wu, J. Guo, X. Feng, Z. Chen and Y. Pan, *ACS Applied Materials & Interfaces*, 2022, **14**, 15250-15258.
7. S. Zhou, H. Jang, Q. Qin, Z. Li, M. Gyu Kim, X. Ji, X. Liu and J. Cho, *Chemical Engineering Journal*, 2021, **414**, 128865.
8. G. Li, K. Zheng, W. Li, Y. He and C. Xu, *ACS Applied Materials & Interfaces*, 2020, **12**, 51437-51447.
9. B. Sarkar, D. Das and K. K. Nanda, *Green Chemistry*, 2020, **22**, 7884-7895.
10. R. Guo, W. Shi, Wenzhu Liu, X. Yang, Y. Xie, T. Yang and J. Xiao, *Chemical Engineering Journal*, 2022, **429**, 132478.
11. W. Feng, Y. Feng, J. Chen, H. Wang, Y. Hu, T. Luo, C. Yuan, L. Cao, L. Feng and J. Huang, *Chemical Engineering Journal*, 2022, **437**, 135456.
12. H. Hu, F. M. D. Kazim, Q. Zhang, K. Qu, Z. Yang and W. Cai, *ChemCatChem*, 2019, **11**, 4327-4333.
13. C.-Z. Yuan, S. Wang, K. San Hui, K. Wang, J. Li, H. Gao, C. Zha, X. Zhang, D. A. Dinh, X.-L. Wu, Z. Tang, J. Wan, Z. Shao and K. N. Hui, *ACS Catalysis*, 2023, **13**, 2462-2471.
14. C. Rong, X. Shen, Y. Wang, L. Thomsen, T. Zhao, Y. Li, X. Lu, R. Amal

- and C. Zhao, *Advanced Materials*, 2022, **34**, 2110103.
15. F. Zhu, J. Xue, L. Zeng, J. Shang, S. Lu, X. Cao, B. F. Abrahams, H. Gu and J. Lang, *Nano Research*, 2021, **15**, 1020-1026.
  16. T. Qiu, Z. Liang, W. Guo, S. Gao, C. Qu, H. Tabassum, H. Zhang, B. Zhu, R. Zou and Y. Shao-Horn, *Nano Energy*, 2019, **58**, 1-10.
  17. A. Kong, M. Peng, H. Gu, S. Zhao, Y. Lv, M. Liu, Y. Sun, S. Dai, Y. Fu, J. Zhang and W. Li, *Chemical Engineering Journal*, 2021, **426**, 131234.
  18. Y. Pei, S. Guo, Q. Ju, Z. Li, P. Zhuang, R. Ma, Y. Hu, Y. Zhu, M. Yang, Y. Zhou, J. Shen and J. Wang, *ACS Applied Materials & Interfaces*, 2020, **12**, 36177-36185.
  19. L. Zhang, Z. Hu, H. Li, Q. Ren, Y. Qiu, J. Qu and S. Hu, *Chemphyschem*, 2021, **22**, 1785-1791.
  20. D. Chen, R. Yu, D. Wu, H. Zhao, P. Wang, J. Zhu, P. Ji, Z. Pu, L. Chen, J. Yu and S. Mu, *Nano Energy*, 2022, **100**, 107445.
  21. Y. Xue, Q. Yan, X. Bai, Y. Xu, X. Zhang, Y. Li, K. Zhu, K. Ye, J. Yan, D. Cao and G. Wang, *Journal of Colloid and Interface Science*, 2022, **612**, 710-721.
